# Supplementary material for: A Novel Framework for Assessing Regional Wildfires Contributions to Biomass Burning Aerosol Optical Depth
Source: Copernicus journal article supplement (doi:10.5194/egusphere-2025-1223), 2025-04-17

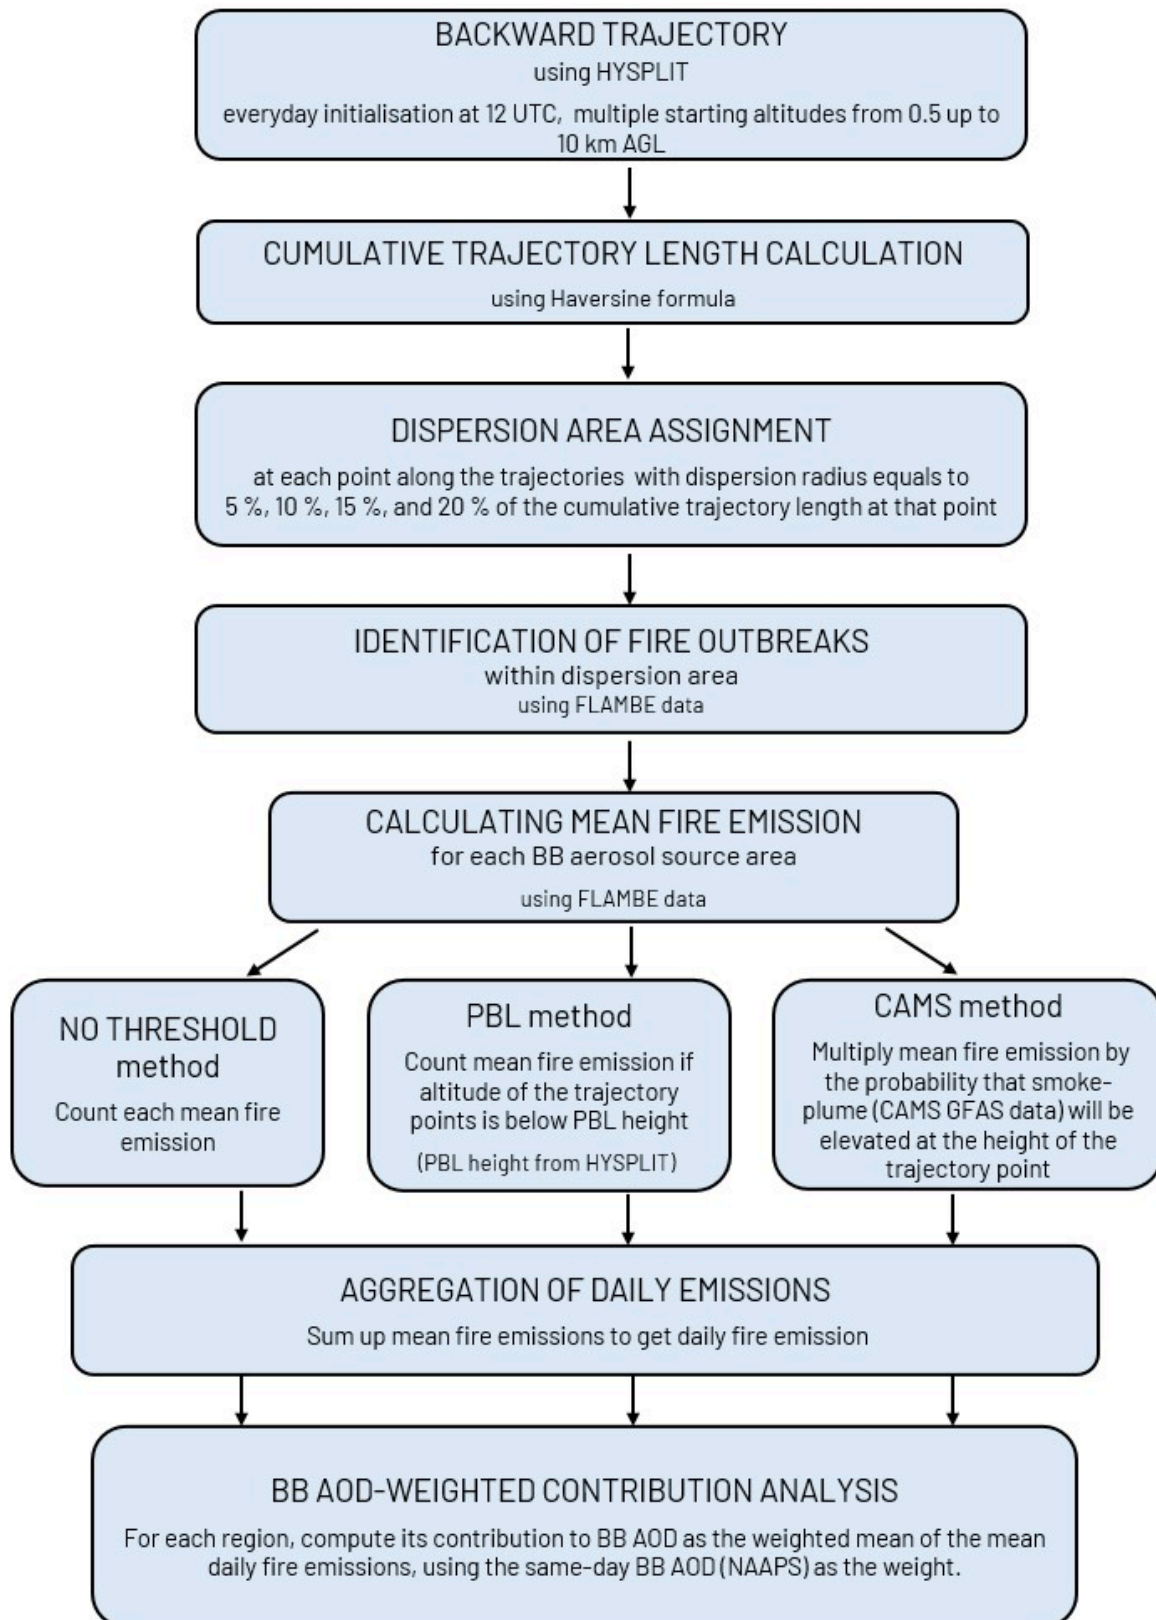

Supplement: Supplementary file [file egusphere-2025-1223-AC1-supplement.pdf]
