# Supplementary material for: A Novel Framework for Assessing Regional Wildfires Contributions to Biomass Burning Aerosol Optical Depth
Source: Copernicus journal article supplement (doi:10.5194/egusphere-2025-1223), 2025-04-17
Supplement: Supplementary file [file egusphere-2025-1223-AC3-supplement.pdf]

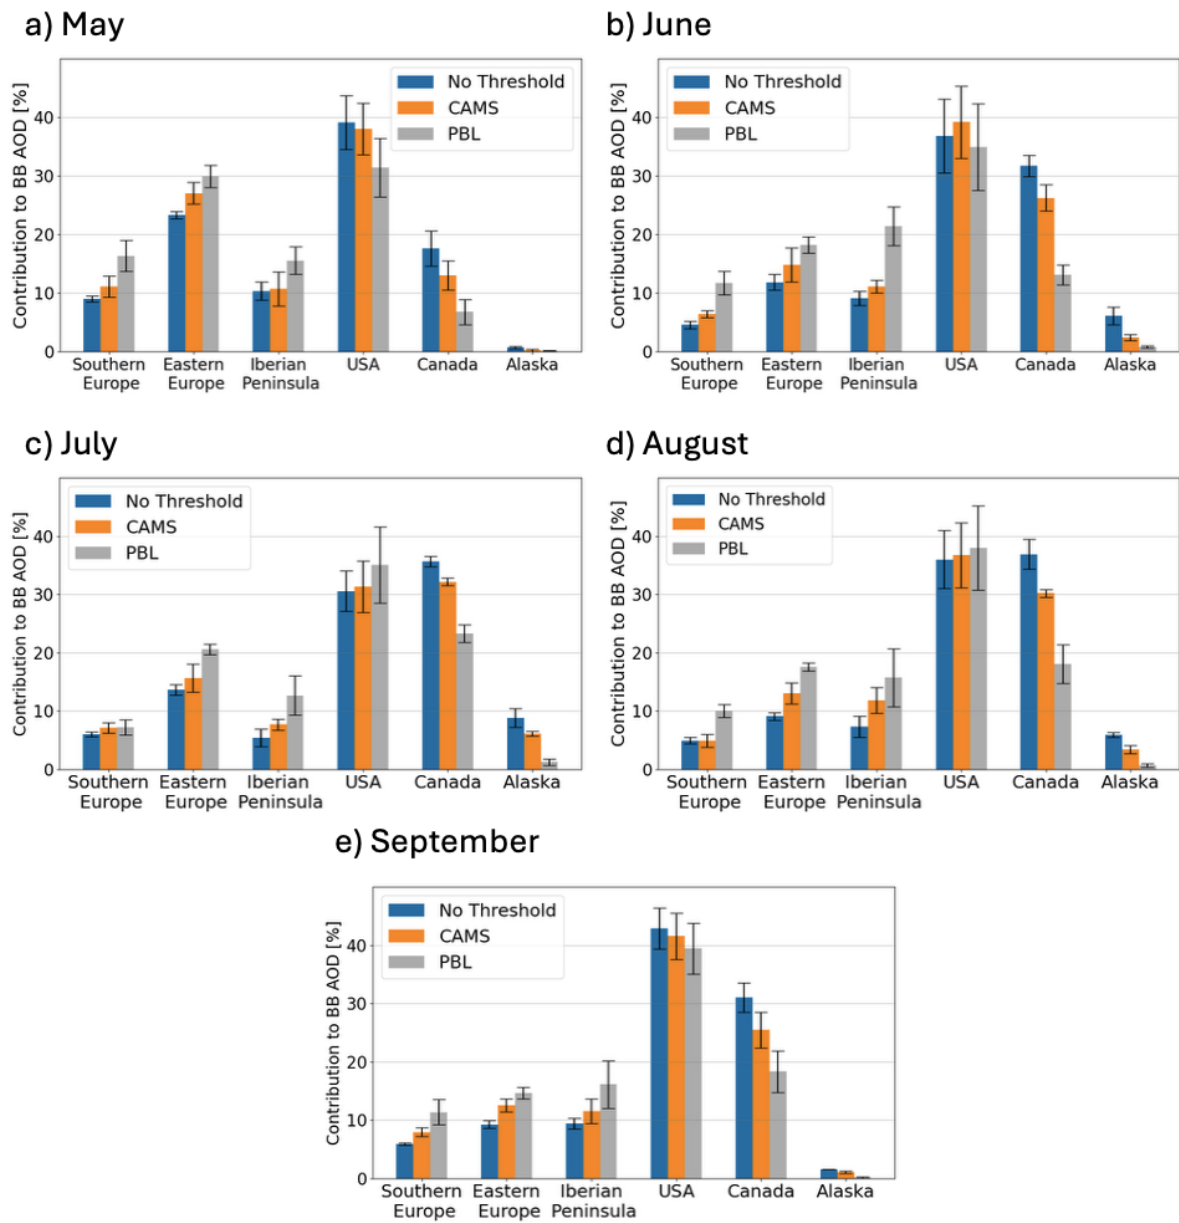

**Figure 12.** Monthly contributions to BB AOD across selected regions (Southern Europe, Eastern Europe, Iberian Peninsula, USA, Canada and Alaska) for May (a), June (b), July (c), August (d), and September (e). The contributions are calculated using three methods: No Threshold, CAMS, and PBL.

### a) Iberian Peninsula, Southern Europe and Eastern Europe

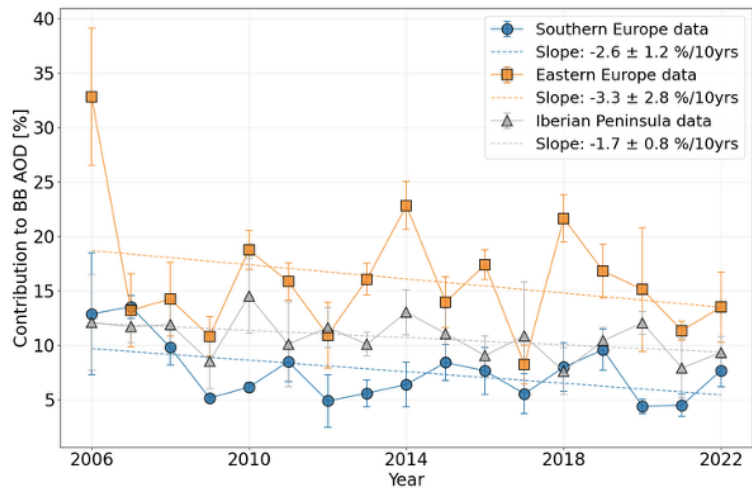

### b) Canada, USA and Alaska

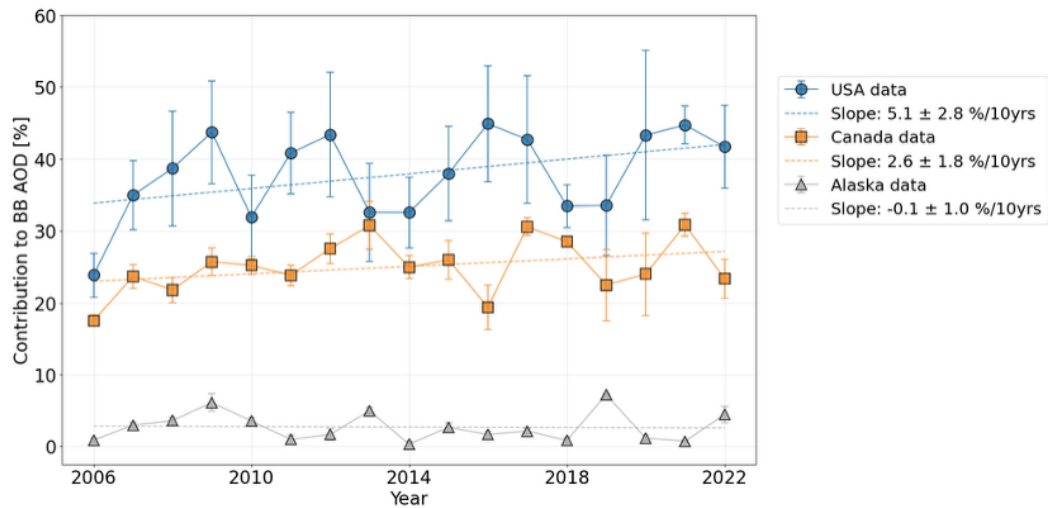

**Figure 13.** Temporal variability in contributions to BB AOD in years 2006-2022, calculated for the regions: (a) Iberian Peninsula, Southern Europe, and Eastern Europe, and (b) Canada , the USA and Alaska. Contributions were determined using the CAMS method and averaged over months May-September and averaged over four dispersion radii (5 % , 10 % , 15 % , and 20 % of the trajectory length).
